# Supplementary material for: Role of the local order on the thermal cis-to-trans isomerisation kinetics of azo-dyes in nematic liquid crystals
Source: Royal Society of Chemistry journal article supplement (doi:10.1039/c1cp20280d), 2011-01-01
Supplement: c1cp20280d.pdf [file c1cp20280d.pdf]

## Role of the local order on the thermal *cis-to-trans* isomerisation kinetics of azo-dyes in nematic liquid crystals

Jaume Garcia-Amorós, Heino Finkelmann and Dolores Velasco\*

### Supplementary Information

**Table S1.** First-order rate constants,  $k$ , and half-life times,  $t_{1/2}$ , for the thermal *cis-to-trans* isomerisation process of **AZO6** in different isotropic solvents and host nematogens at different temperatures. The experimental error associated to temperature and first-order rate constant was of  $\pm 0.1$  K and less than 10 %, respectively.

| <i>Solvent</i>      | <i>Temperature</i> / K | $10^5 \times k$ / s <sup>-1</sup> | $t_{1/2}$ / h |
|---------------------|------------------------|-----------------------------------|---------------|
| <i>acetonitrile</i> | 298                    | 1.47                              | 13            |
|                     | 308                    | 4.83                              | 4.0           |
|                     | 313                    | 9.08                              | 2.1           |
|                     | 318                    | 15.9                              | 1.2           |
|                     | 328                    | 47.3                              | 0.41          |
| <i>ethanol</i>      | 298                    | 2.30                              | 8.4           |
|                     | 308                    | 7.68                              | 2.5           |
|                     | 313                    | 13.3                              | 1.4           |
|                     | 318                    | 25.2                              | 0.76          |
|                     | 328                    | 71.0                              | 0.27          |
| <i>toluene</i>      | 298                    | 1.95                              | 9.9           |
|                     | 308                    | 6.50                              | 3.0           |
|                     | 313                    | 11.6                              | 1.7           |
|                     | 318                    | 20.5                              | 0.94          |
|                     | 328                    | 60.2                              | 0.32          |
| <i>cyclohexane</i>  | 298                    | 2.38                              | 8.1           |
|                     | 308                    | 7.45                              | 2.6           |
|                     | 313                    | 13.3                              | 1.4           |

|                         |     |      |      |
|-------------------------|-----|------|------|
|                         | 318 | 23.8 | 0.81 |
|                         | 328 | 66.2 | 0.29 |
| <hr/>                   |     |      |      |
| <i>5CB nematic</i>      | 294 | 2.93 | 6.6  |
|                         | 298 | 4.28 | 4.5  |
|                         | 301 | 5.67 | 3.4  |
|                         | 303 | 6.88 | 2.8  |
|                         | 305 | 8.23 | 2.3  |
| <hr/>                   |     |      |      |
| <i>5CB isotropic</i>    | 313 | 17.8 | 1.1  |
|                         | 318 | 30.4 | 0.63 |
|                         | 323 | 51.1 | 0.38 |
|                         | 328 | 85.2 | 0.22 |
|                         | 333 | 143  | 0.13 |
| <hr/>                   |     |      |      |
| <i>ZLI-1695 nematic</i> | 298 | 6.12 | 3.1  |
|                         | 303 | 10.4 | 1.8  |
|                         | 308 | 18.2 | 1.1  |
|                         | 313 | 30.3 | 0.63 |
|                         | 318 | 50.2 | 0.38 |
|                         | 323 | 80.1 | 0.24 |
| <hr/>                   |     |      |      |
| <i>MC4C6 nematic</i>    | 306 | 9.01 | 2.1  |
|                         | 309 | 12.0 | 1.6  |
|                         | 311 | 14.6 | 1.3  |
|                         | 313 | 17.5 | 1.1  |
| <hr/>                   |     |      |      |
| <i>MC4C6 isotropic</i>  | 323 | 46.5 | 0.41 |
|                         | 328 | 76.4 | 0.25 |
|                         | 333 | 127  | 0.15 |
|                         | 338 | 210  | 0.09 |
| <hr/>                   |     |      |      |
| <i>MC5CHX nematic</i>   | 308 | 16.3 | 1.2  |
|                         | 313 | 27.3 | 0.70 |
|                         | 318 | 44.1 | 0.44 |
|                         | 323 | 70.4 | 0.27 |
| <hr/>                   |     |      |      |
